# Supplementary material
Source: Springer Nature journal article supplement (https://www.springermedizin.de/resource/supplementary/13058_2013_3393_MOESM2_ESM.pdf/9704054)

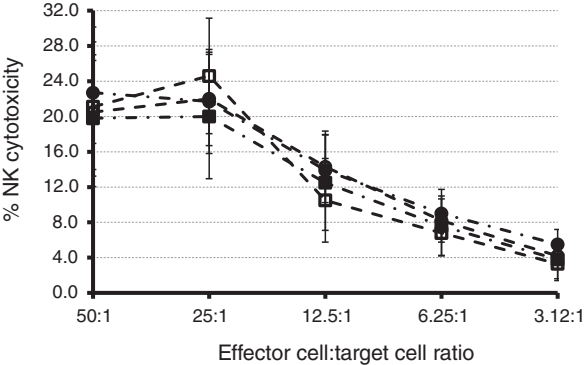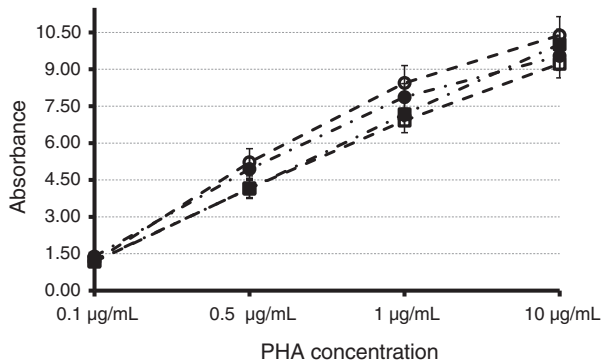

Supplement: MOESM2 [file 9704054]
